# Supplementary material for: Tandem Expression of a Mobile RNA and Its RNA-Binding Protein(s) Enhances Tuber Productivity in Potato
Source: MDPI journal article supplement (doi:10.3390/ijms242115754), 2023-10-30
Supplement: s1 [file s1]

**Supplementary Table S1.** List of primers used in this study.

| Sr. No. | Primer name                 | Sequence (5'→3')           | Amplicon size                | Purpose                                 |
|---------|-----------------------------|----------------------------|------------------------------|-----------------------------------------|
| 1       | Prom <i>StBEL5</i> F        | GCACCATAGCCAAAAAGTCTTAAGAC | 2242 bp                      | <i>StBEL5</i> promoter cloning          |
| 2       | Prom <i>StBEL5</i> R        | CTGTAAACAGAAAGTAACAAAGG    |                              |                                         |
| 3       | <i>StBEL5</i> CDS-5'UTR F   | CATGCAGAGATAAAAAATATAGATC  | 2716 bp                      | <i>StBEL5</i> coding sequence cloning   |
| 4       | <i>StBEL5</i> CDS R         | GCTAATCTAATAATGATAGCACA    |                              |                                         |
| 5       | Prom <i>StPTB1</i> F        | CTTGGGTAGTCTTCCGCTTGTAG    | 2301 bp                      | <i>StPTB1</i> promoter cloning          |
| 6       | Prom <i>StPTB1</i> -5'UTR R | TTATACCTGAATCACAACAAAAC    |                              |                                         |
| 7       | <i>StPTB1</i> CDS F         | GGTATAAATGTCTGATCCTTC      | 1338 bp                      | <i>StPTB1</i> coding sequence cloning   |
| 8       | <i>StPTB1</i> CDS R         | GACTTCTCAGATGCTCTGTAAC     |                              |                                         |
| 9       | Prom <i>StPTB6</i> F        | CGAGTTGTGGTGAGACGGTTAGTAG  | 2458 bp                      | <i>StPTB6</i> promoter cloning          |
| 10      | Prom <i>StPTB6</i> -5'UTR R | TTTTTACCTGAATCACAAAAACAATG |                              |                                         |
| 11      | <i>StPTB6</i> CDS F         | GGTAAAAAATGACTGAGCCGTC     | 1348 bp                      | <i>StPTB6</i> coding sequence cloning   |
| 12      | <i>StPTB6</i> CDS R         | GGCTTCTCAGATGCTTTGCAC      |                              |                                         |
| 13      | <i>StBEL5</i> _3' F         | TGTGATATTGTTCCCTCTCAATTTGC | 190 bp with <i>UbiTscr</i> R | Confirmation of stable transgenic lines |
| 14      | <i>StPTB1</i> _3' F         | GAGGCACTCGTATGCAAAAA       | 157 bp with <i>NosTscr</i> R |                                         |
| 15      | <i>StPTB6</i> _3' F         | CATGCTACATCCCTTGGTGG       | 181 bp with <i>UbiTscr</i> R |                                         |
| 16      | <i>NosTscr</i> R            | GCAACAGGATTCAATCTTAAG      |                              |                                         |
| 17      | <i>UbiTscr</i> R            | ATTACCGTTCGACAAAAAGAGAAA   |                              |                                         |
| 18      | <i>StEIF3e</i> qF           | GGAGCACAGGAGAAGATGAAGGAG   | 164 bp                       | RT-qPCR analysis                        |
| 19      | <i>StEIF3e</i> qR           | CGTTGGTGAATGCGGCAGTAGG     |                              |                                         |
| 20      | <i>StBEL5</i> qF            | AGGGATACTCTTATATTGTGTGTGAG | 90 bp                        |                                         |
| 21      | <i>StBEL5</i> qR            | GTCTCCACTTCTTCTCTCCTATG    |                              |                                         |
| 22      | <i>StCDF1</i> qF            | TGCAGACTCGTCGATTGAAC       | 130 bp                       |                                         |

|    |                      |                           |        |  |
|----|----------------------|---------------------------|--------|--|
| 23 | <i>StCDF1</i> qR     | GAGTGCCTTTTCCTCACTCG      |        |  |
| 24 | <i>StPTB1</i> qF     | GCGCAATAAACCCAGATCATGC    | 112 bp |  |
| 25 | <i>StPTB1</i> qR     | GTTGACTTCCAGACGCTTTTC     |        |  |
| 26 | <i>StPTB6</i> qF     | TCATGCTCTTGTTTCAGATGGG    | 130 bp |  |
| 27 | <i>StPTB6</i> qR     | TGGTCCGGTGTTAATATTTGGG    |        |  |
| 28 | <i>StSWEET11b</i> qF | GTGATGCATGTGCATGTTTG      | 114 bp |  |
| 29 | <i>StSWEET11b</i> qR | CAACGGCCAATCTCCTCTAA      |        |  |
| 30 | <i>StIT</i> qF       | AAGAGCTCGTCGCCGTTAAA      | 150 bp |  |
| 31 | <i>StIT</i> qR       | GCAGGTCTACGAGCTGTGTT      |        |  |
| 32 | <i>StSP6A</i> qF     | GACGATCTTCGCAACTTTTACA    | 74 bp  |  |
| 33 | <i>StSP6A</i> qR     | CCTCAAGTTAGGGTCGCTTG      |        |  |
| 34 | <i>StSP5G</i> qF     | GGTGTGTAGACTTTGGTGTGGTTT  | 96 bp  |  |
| 35 | <i>StSP5G</i> qR     | GGCCTCAAGGCACATCCAT       |        |  |
| 36 | <i>StSP3D</i> qF     | GGACCCAGATGCTCCAAGTC      | 64 bp  |  |
| 37 | <i>StSP3D</i> qR     | CTTGCCAAAACCTGAACCTG      |        |  |
| 38 | <i>StPIN4</i> qF     | GGGACCCACTGGACTGACTA      | 109 bp |  |
| 39 | <i>StPIN4</i> qR     | ACTTGCTGGAGGCATCTGTT      |        |  |
| 40 | <i>StGA2ox1</i> qF   | TTCTCTACAATGAGTTCACATGGTC | 78 bp  |  |
| 41 | <i>StGA2ox1</i> qR   | GGGACAACCTATTATCACCAAGC   |        |  |
| 42 | <i>StCO2</i> qF      | CTGGGTTTAGATAGAGAAGCAAG   | 177 bp |  |
| 43 | <i>StCO2</i> qR      | GTCAACGTCATCAAACTCGC      |        |  |
| 44 | <i>St14-3-3</i> qF   | ACATTCCCAGAGTTCCTTGTC     | 124 bp |  |
| 45 | <i>St14-3-3</i> qR   | ACTTTGGACCCAACCTGCTC      |        |  |
