# Supplementary material for: Tandem Expression of a Mobile RNA and Its RNA-Binding Protein(s) Enhances Tuber Productivity in Potato
Source: MDPI journal article supplement (doi:10.3390/ijms242115754), 2023-10-30
Supplement: s1 [file s1]

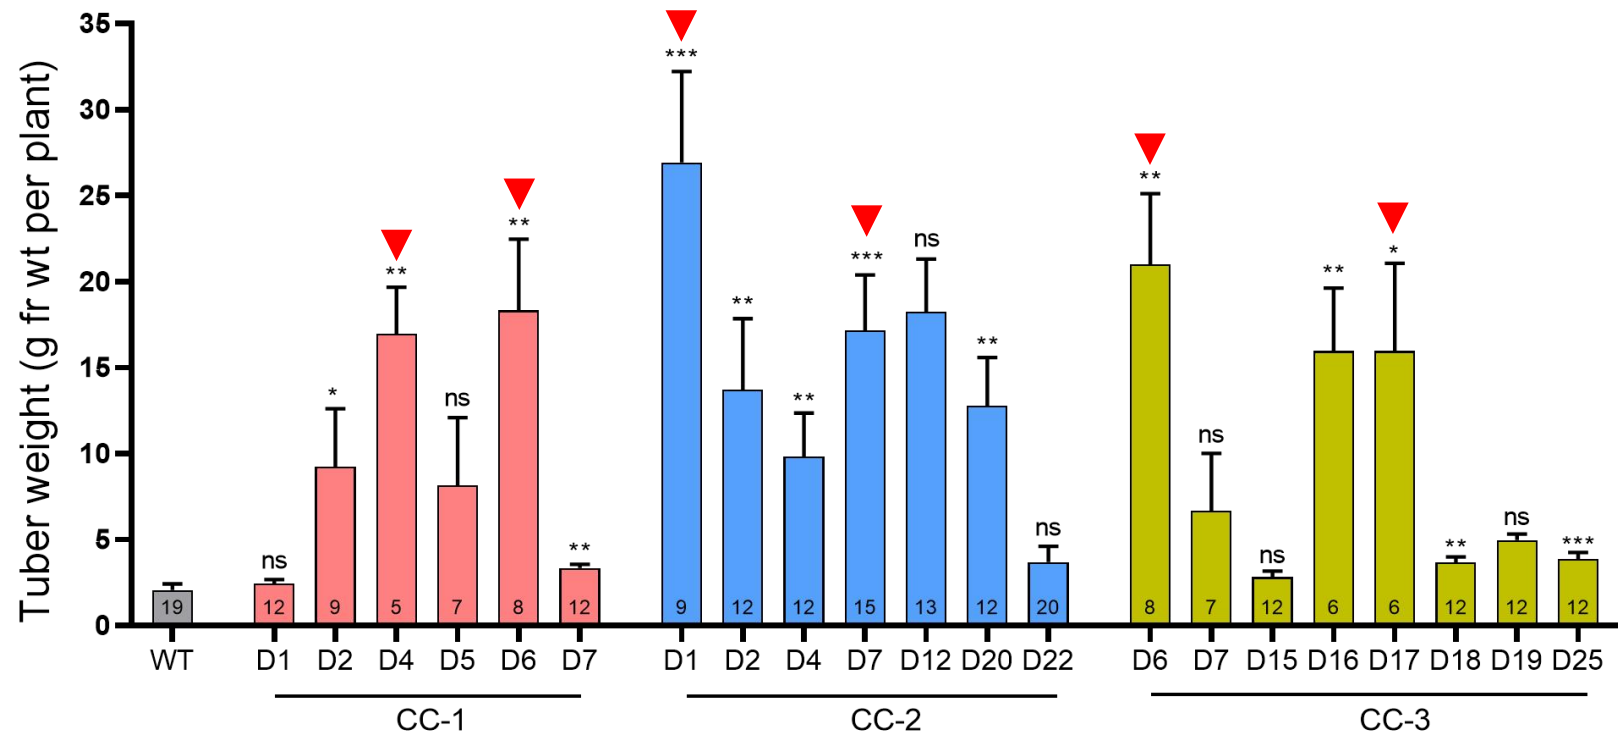

**Figure S1.** Average tuber weight in transgenic *Solanum tuberosum* cv. Désirée CC lines grown for two months in greenhouse under long-day conditions. Numbers inside the bars represent the number of plants per line (n). Error bars represent mean  $\pm$  SEM. Student's t-test was used at  $p < 0.05$  (\* $P < 0.05$ , \*\* $P < 0.01$ , \*\*\* $P < 0.001$ , ns, not significant). CC lines marked with red arrowhead were selected for further studies. We refer CC-1 lines (D4 and D6), CC-2 lines (D1 and D7), and CC-3 lines (D6 and D17) as respective #1 and #2 lines.

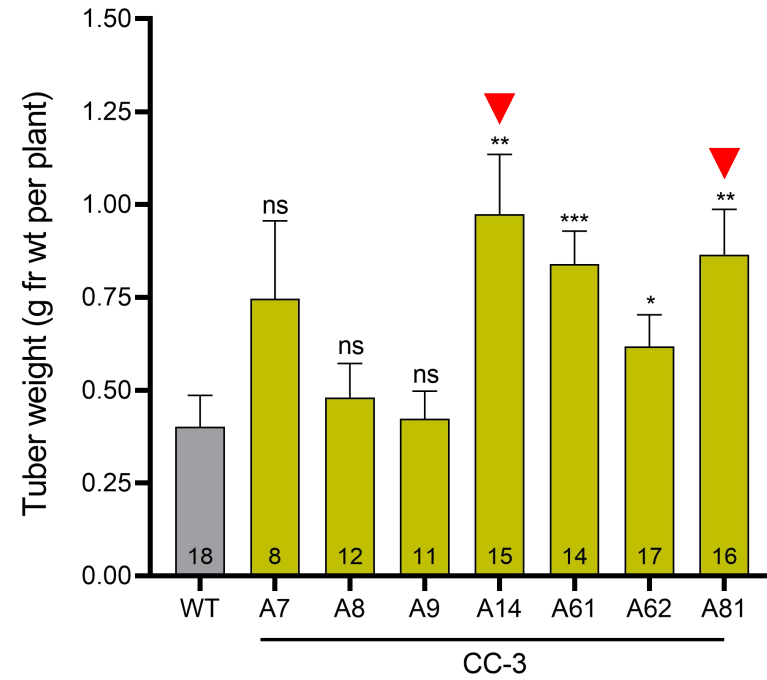

**Figure S2.** Average tuber weight in transgenic *Solanum tuberosum* ssp. *andigena*. CC lines grown in plant growth chamber. The plants were first grown for 10-weeks under long-day conditions, following which they were subjected to a short-day photoperiod induction for three weeks before harvesting the plants for tuber data. Numbers inside the bars represent the number of plants per line (n). Error bars represent mean  $\pm$  SEM. Student's t-test was used at  $p < 0.05$  (\* $P < 0.05$ , \*\* $P < 0.01$ , \*\*\* $P < 0.001$ , ns, not significant). In the main figure and the manuscript text hereafter, CC-3 lines marked with red arrowhead (A14 and A81) are referred as #1 and #2 line, respectively.
